# Supplementary material
Source: publisher figshare collection journal article supplement (https://frontiersin.figshare.com/ndownloader/files/22827488)
Supplement: Supplementary file 1 [file 22827488]

## Sheet: Lansat_8_img
path_row	Date
034_041	20160129
034_042	20160214	Image with the largest area of crops that are active photosynthetic for autumn-winter
034_043	20160317
034_044	20160418
034_045	20160504
034_046	20160605
034_047	20160707
034_048	20160824
034_049	20160909	Image with the largest area of crops that are active photosynthetic for for spring-summer
034_050	20161011
034_051	20161112
034_052	20161214

## Sheet: MODIS_LIST
Month Year	Image	num
September 2015	A2015244210000.L2_LAC_OC.nc	1
September 2015	A2015245200500.L2_LAC_OC.nc	2
September 2015	A2015246205000.L2_LAC_OC.nc	3
September 2015	A2015254200000.L2_LAC_OC.nc	4
September 2015	A2015255204000.L2_LAC_OC.nc	5
September 2015	A2015255204500.L2_LAC_OC.nc	6
September 2015	A2015256212500.L2_LAC_OC.nc	7
September 2015	A2015258211500.L2_LAC_OC.nc	8
September 2015	A2015261200500.L2_LAC_OC.nc	9
September 2015	A2015262205000.L2_LAC_OC.nc	10
September 2015	A2015265212000.L2_LAC_OC.nc	11
September 2015	A2015267210500.L2_LAC_OC.nc	12
September 2015	A2015268201000.L2_LAC_OC.nc	13
September 2015	A2015269205500.L2_LAC_OC.nc	14
September 2015	A2015271204000.L2_LAC_OC.nc	15
September 2015	A2015271204500.L2_LAC_OC.nc	16
September 2015	A2015272195000.L2_LAC_OC.nc	17
September 2015	A2015272212500.L2_LAC_OC.nc	18
September 2015	A2015273203000.L2_LAC_OC.nc	19
October 2015	A2015274211500.L2_LAC_OC.nc	1
October 2015	A2015277200500.L2_LAC_OC.nc	2
October 2015	A2015280203500.L2_LAC_OC.nc	3
October 2015	A2015281212000.L2_LAC_OC.nc	4
October 2015	A2015282202500.L2_LAC_OC.nc	5
October 2015	A2015287204000.L2_LAC_OC.nc	6
October 2015	A2015288212500.L2_LAC_OC.nc	7
October 2015	A2015289203000.L2_LAC_OC.nc	8
October 2015	A2015290211500.L2_LAC_OC.nc	9
October 2015	A2015291201500.L2_LAC_OC.nc	10
October 2015	A2015291202000.L2_LAC_OC.nc	11
October 2015	A2015292210000.L2_LAC_OC.nc	12
October 2015	A2015293200500.L2_LAC_OC.nc	13
October 2015	A2015294205000.L2_LAC_OC.nc	14
October 2015	A2015296203500.L2_LAC_OC.nc	15
October 2015	A2015297212000.L2_LAC_OC.nc	16
October 2015	A2015298202500.L2_LAC_OC.nc	17
October 2015	A2015299210500.L2_LAC_OC.nc	18
October 2015	A2015299211000.L2_LAC_OC.nc	19
October 2015	A2015300201000.L2_LAC_OC.nc	20
October 2015	A2015301205500.L2_LAC_OC.nc	21
October 2015	A2015303204500.L2_LAC_OC.nc	22
October 2015	A2015304194500.L2_LAC_OC.nc	23
October 2015	A2015304212500.L2_LAC_OC.nc	24
November 2015	A2015306211500.L2_LAC_OC.nc	1
November 2015	A2015307202000.L2_LAC_OC.nc	2
November 2015	A2015308210000.L2_LAC_OC.nc	3
November 2015	A2015309200500.L2_LAC_OC.nc	4
November 2015	A2015310205000.L2_LAC_OC.nc	5
November 2015	A2015312203500.L2_LAC_OC.nc	6
November 2015	A2015313212000.L2_LAC_OC.nc	7
November 2015	A2015314202500.L2_LAC_OC.nc	8
November 2015	A2015315210500.L2_LAC_OC.nc	9
November 2015	A2015316201000.L2_LAC_OC.nc	10
November 2015	A2015317205500.L2_LAC_OC.nc	11
November 2015	A2015318200000.L2_LAC_OC.nc	12
November 2015	A2015321203000.L2_LAC_OC.nc	13
November 2015	A2015322211500.L2_LAC_OC.nc	14
November 2015	A2015323201500.L2_LAC_OC.nc	15
November 2015	A2015323202000.L2_LAC_OC.nc	16
November 2015	A2015324210000.L2_LAC_OC.nc	17
November 2015	A2015325200500.L2_LAC_OC.nc	18
November 2015	A2015326205000.L2_LAC_OC.nc	19
November 2015	A2015328203500.L2_LAC_OC.nc	20
November 2015	A2015330202500.L2_LAC_OC.nc	21
November 2015	A2015331210500.L2_LAC_OC.nc	22
November 2015	A2015332201000.L2_LAC_OC.nc	23
November 2015	A2015333205500.L2_LAC_OC.nc	24
December 2015	A2015336212500.L2_LAC_OC.nc	1
December 2015	A2015338211500.L2_LAC_OC.nc	2
December 2015	A2015339202000.L2_LAC_OC.nc	3
December 2015	A2015340210000.L2_LAC_OC.nc	4
December 2015	A2015341200500.L2_LAC_OC.nc	5
December 2015	A2015342205000.L2_LAC_OC.nc	6
December 2015	A2015344203500.L2_LAC_OC.nc	7
December 2015	A2015345212000.L2_LAC_OC.nc	8
December 2015	A2015346202500.L2_LAC_OC.nc	9
December 2015	A2015348201000.L2_LAC_OC.nc	10
December 2015	A2015349205500.L2_LAC_OC.nc	11
December 2015	A2015351204000.L2_LAC_OC.nc	12
December 2015	A2015351204500.L2_LAC_OC.nc	13
December 2015	A2015354211500.L2_LAC_OC.nc	14
December 2015	A2015355202000.L2_LAC_OC.nc	15
December 2015	A2015356210000.L2_LAC_OC.nc	16
December 2015	A2015357200500.L2_LAC_OC.nc	17
December 2015	A2015358205000.L2_LAC_OC.nc	18
December 2015	A2015360203500.L2_LAC_OC.nc	19
December 2015	A2015361212000.L2_LAC_OC.nc	20
December 2015	A2015363210500.L2_LAC_OC.nc	21
December 2015	A2015364201000.L2_LAC_OC.nc	22
December 2015	A2015365205500.L2_LAC_OC.nc	23
January 2016	A2016002204000.L2_LAC_OC.nc	1
January 2016	A2016005211500.L2_LAC_OC.nc	2
January 2016	A2016023210000.L2_LAC_OC.nc	3
January 2016	A2016027203500.L2_LAC_OC.nc	4
January 2016	A2016028212000.L2_LAC_OC.nc	5
January 2016	A2016029202500.L2_LAC_OC.nc	6
January 2016	A2016030210500.L2_LAC_OC.nc	7
January 2016	A2016031201000.L2_LAC_OC.nc	8
January 2016	A2016006202000.L2_LAC_OC.nc	9
January 2016	A2016009205000.L2_LAC_OC.nc	10
January 2016	A2016011203500.L2_LAC_OC.nc	11
January 2016	A2016013202500.L2_LAC_OC.nc	12
January 2016	A2016014210500.L2_LAC_OC.nc	13
January 2016	A2016020203000.L2_LAC_OC.nc	14
January 2016	A2016021211500.L2_LAC_OC.nc	15
January 2016	A2016022202000.L2_LAC_OC.nc	16
February 2016	A2016034204000.L2_LAC_OC.nc	1
February 2016	A2016034204500.L2_LAC_OC.nc	2
February 2016	A2016041205000.L2_LAC_OC.nc	3
February 2016	A2016043203500.L2_LAC_OC.nc	4
February 2016	A2016047201000.L2_LAC_OC.nc	5
February 2016	A2016048205500.L2_LAC_OC.nc	6
February 2016	A2016049200000.L2_LAC_OC.nc	7
February 2016	A2016052203000.L2_LAC_OC.nc	8
February 2016	A2016053211500.L2_LAC_OC.nc	9
February 2016	A2016057205000.L2_LAC_OC.nc	10
February 2016	A2016059203500.L2_LAC_OC.nc	11
February 2016	A2016060212000.L2_LAC_OC.nc	12
March 2016	A2016061202500.L2_LAC_OC.nc	1
March 2016	A2016062210500.L2_LAC_OC.nc	2
March 2016	A2016063201000.L2_LAC_OC.nc	3
March 2016	A2016064205500.L2_LAC_OC.nc	4
March 2016	A2016069211500.L2_LAC_OC.nc	5
March 2016	A2016070202000.L2_LAC_OC.nc	6
March 2016	A2016071210000.L2_LAC_OC.nc	7
March 2016	A2016082204500.L2_LAC_OC.nc	8
March 2016	A2016085211500.L2_LAC_OC.nc	9
March 2016	A2016087210000.L2_LAC_OC.nc	10
March 2016	A2016088200500.L2_LAC_OC.nc	11
April 2016	A2016092212000.L2_LAC_OC.nc	1
April 2016	A2016094211000.L2_LAC_OC.nc	2
April 2016	A2016101211500.L2_LAC_OC.nc	3
April 2016	A2016102202000.L2_LAC_OC.nc	4
April 2016	A2016103210000.L2_LAC_OC.nc	5
April 2016	A2016105205000.L2_LAC_OC.nc	6
April 2016	A2016108212000.L2_LAC_OC.nc	7
April 2016	A2016110211000.L2_LAC_OC.nc	8
April 2016	A2016111201500.L2_LAC_OC.nc	9
April 2016	A2016112205500.L2_LAC_OC.nc	10
April 2016	A2016114204500.L2_LAC_OC.nc	11
April 2016	A2016117211500.L2_LAC_OC.nc	12
April 2016	A2016119210000.L2_LAC_OC.nc	13
April 2016	A2016121205000.L2_LAC_OC.nc	14
2016-05-01	A2016124212000.L2_LAC_OC.nc	1
2016-05-01	A2016128205500.L2_LAC_OC.nc	2
2016-05-01	A2016133211500.L2_LAC_OC.nc	3
2016-05-01	A2016136200500.L2_LAC_OC.nc	4
2016-05-01	A2016137205000.L2_LAC_OC.nc	5
2016-05-01	A2016140212000.L2_LAC_OC.nc	6
2016-05-01	A2016142210500.L2_LAC_OC.nc	7
2016-05-01	A2016149211500.L2_LAC_OC.nc	8
2016-05-01	A2016150202000.L2_LAC_OC.nc	9
2016-05-01	A2016152200500.L2_LAC_OC.nc	10
2016-06-02	A2016153205000.L2_LAC_OC.nc	1
2016-06-03	A2016156212000.L2_LAC_OC.nc	2
2016-06-04	A2016160205500.L2_LAC_OC.nc	3
2016-06-05	A2016165211500.L2_LAC_OC.nc	4
2016-06-06	A2016167210000.L2_LAC_OC.nc	5
2016-06-07	A2016169205000.L2_LAC_OC.nc	6
2016-06-08	A2016174210500.L2_LAC_OC.nc	7
2016-06-09	A2016176205500.L2_LAC_OC.nc	8
2016-07-10	A2016183210000.L2_LAC_OC.nc	1
2016-07-11	A2016184200500.L2_LAC_OC.nc	2
2016-07-12	A2016185205000.L2_LAC_OC.nc	3
2016-07-13	A2016188212000.L2_LAC_OC.nc	4
2016-07-14	A2016190210500.L2_LAC_OC.nc	5
2016-07-15	A2016192205500.L2_LAC_OC.nc	6
2016-07-16	A2016199210000.L2_LAC_OC.nc	7
2016-07-17	A2016204212000.L2_LAC_OC.nc	8
2016-07-18	A2016206210500.L2_LAC_OC.nc	9
2016-07-19	A2016207201000.L2_LAC_OC.nc	10
2016-07-20	A2016208205500.L2_LAC_OC.nc	11
2016-08-21	A2016215210000.L2_LAC_OC.nc	1
2016-08-22	A2016217205000.L2_LAC_OC.nc	2
2016-08-23	A2016224205500.L2_LAC_OC.nc	3
2016-08-24	A2016229211500.L2_LAC_OC.nc	4
2016-08-25	A2016231210000.L2_LAC_OC.nc	5
2016-08-26	A2016233205000.L2_LAC_OC.nc	6
2016-08-27	A2016238210500.L2_LAC_OC.nc	7
2016-08-28	A2016239201000.L2_LAC_OC.nc	8
2016-08-29	A2016241200000.L2_LAC_OC.nc	9
2016-08-30	A2016242204000.L2_LAC_OC.nc	10
2016-09-30	A2016245211500.L2_LAC_OC.nc	1
2016-09-30	A2016247210000.L2_LAC_OC.nc	2
2016-09-30	A2016252212000.L2_LAC_OC.nc	3
2016-09-30	A2016254210500.L2_LAC_OC.nc	4
2016-09-30	A2016255201000.L2_LAC_OC.nc	5
2016-09-30	A2016256205500.L2_LAC_OC.nc	6
2016-09-30	A2016257200000.L2_LAC_OC.nc	7
2016-09-30	A2016258204000.L2_LAC_OC.nc	8
2016-09-30	A2016261211000.L2_LAC_OC.nc	9
2016-09-30	A2016265205000.L2_LAC_OC.nc	10
2016-09-30	A2016267203500.L2_LAC_OC.nc	11
2016-09-30	A2016268212000.L2_LAC_OC.nc	12
2016-09-30	A2016270210500.L2_LAC_OC.nc	13
2016-09-30	A2016272205500.L2_LAC_OC.nc	14
2016-09-30	A2016274204000.L2_LAC_OC.nc	15

## Sheet: tables_2_in_the_manuscript
Table2
Basin/Strata	Cultivation Area (Ha)	± 95% (Ha)	Soil (Ha)	± 95% (Ha)	Vegetation(Ha)	± 95% (Ha)	Water (Ha)	± 95% (Ha)	Cloud	± 95%	Total (Ha)
February
Laguna Tobari	61839	2403	35178	2722	7866	2372	5739	752	-	-	110622
Aquaculture farms	10562	529	10083	706	1957	587	334	249	-	-	22936
Coast center	336	41	2213	58	234	50	125	34	-	-	2907
North center	1989	104	4184	236	1016	245	2	0	-	-	7191
Rio mayo	37847	1929	28327	1837	5051	1665	711	620	-	-	71937
South center	6599	252	3235	249	544	194	22	43	-	-	10400
South aquaculture farms	1246	152	7172	208	881	198	114	58	-	-	9414
Laguna Yavaros	15686	925	13347	943	3246	920	7347	692	-	-	39626
total	136104	6334	103739	6960	20795	6231	14394	2448	-	-	275032
Total Basins Area in Percentage	0.4949	0.023	0.3772	0.0253	0.0756	0.0227	0.0523	0.0089	-	-	1
El Mayo Irrigation District (DR)	133835	6816	98773	7946	27047	6976	15538	3421	-	-	275192
Total DR Area in Percentage	0.4863	0.0248	0.3589	0.0289	0.0983	0.0254	0.0565	0.0124	-	-	1
September
Laguna Tobari	30728	2356	56127	2487	14259	2217	7584	834	2003	800	110701
Aquaculture farms	2217	326	14215	535	2350	471	1396	249	2771	307	22948
Coast center	22	16	1987	72	202	43	505	58	192	22	2907
North center	512	70	3398	176	1174	168	602	43	1506	81	7193
Rio mayo	16261	1363	39956	1708	10023	1545	651	420	5078	827	71969
South center	1753	175	6455	257	1094	216	98	74	1000	152	10400
South aquaculture farms	275	82	5257	269	1412	214	929	101	1544	243	9417
Laguna Yavaros	6869	802	19289	986	6164	890	6594	522	660	367	39575
total	58636	5190	146683	6491	36677	5763	18359	2301	14755	2798	275110
Total Basins Area in Percentage	0.2131	0.0189	0.5332	0.0236	0.1333	0.0209	0.0667	0.0084	0.0536	0.0102
El Mayo Irrigation District (DR)	48159	3208	158665	5271	36893	3844	19191	2474	12301	2160	275209
Total DR Area in Percentage	0.175	0.0117	0.5765	0.0192	0.1341	0.014	0.0697	0.009	0.0447	0.0078

## Sheet: tables_3_in_the_manuscript
Table 6
Rio Mayo Irrigation District basins February	Crop (Ha)	95% confidence interval in percentage	Harrison and Matson 2003 (0.046%) (ton)	Riley et al 2001 (2%) (ton)	Riley et al 2001 (5%) (ton)	Riley et al 2001 (17%) (ton)	Riley et al 2001 (28%) (ton)
February
Laguna Tobari	61838.6	0.0389	7.111	309.193	772.983	2628.14	4328.7
Aquaculture farms	10561.9	0.0501	1.215	52.809	132.023	448.878	739.329
Coast center	335.876	0.1233	0.039	1.679	4.198	14.275	23.511
North center	1988.9	0.052	0.229	9.944	24.861	84.528	139.223
Rio mayo	37847.1	0.051	4.352	189.235	473.088	1608.5	2649.29
South center	6599.24	0.0383	0.759	32.996	82.491	280.468	461.947
South aquaculture farms	1246.42	0.1216	0.143	6.232	15.58	52.973	87.249
Laguna Yavaros	15686.2	0.059	1.804	78.431	196.078	666.666	1098.04
Total nitrogen swept to the coast	136104		15.65	680.52	1701.3	5784.43	9527.3
September
Laguna Tobari	30728.3	0.0767	3.534	153.641	384.103	1305.95	2150.98
Aquaculture farms	2216.87	0.1469	0.255	11.084	27.711	94.217	155.181
Coast center	21.719	0.7554	0.002	0.109	0.271	0.923	1.52
North center	511.984	0.1358	0.059	2.56	6.4	21.759	35.839
Rio mayo	16260.8	0.0838	1.87	81.304	203.26	691.083	1138.26
South center	1753.45	0.0998	0.202	8.767	21.918	74.522	122.741
South aquaculture farms	274.627	0.2976	0.032	1.373	3.433	11.672	19.224
Laguna Yavaros	6868.61	0.1168	0.79	34.343	85.858	291.916	480.803
Total nitrogen swept to the coast	58636.3		6.743	293.182	732.954	2492.04	4104.54

## Sheet: tables_4_in_the_manuscript
Table 1
Basin	class	S(Ô n)	n	S(Ôsa)	S(Ûca)	S(Ûs)	S(Ûv)	S (Ûw)	S (Ûc)
February
Rio Mayo Irrigation District	4	0.015	553	0.016	0.017	0.033	0.094	0.04	-
Laguna Tobari	4	0.015	528	0.016	0.017	0.033	0.094	0.044	-
Aquaculture farms	4	0.015	596	0.018	0.017	0.033	0.049	0.073	-
Coast center	4	0.015	745	0.016	0.027	0.019	0.062	0.035	-
North center	4	0.015	682	0.021	0.017	0.03	0.079	0.044	-
Rio mayo	4	0.015	556	0.017	0.018	0.033	0.06	0.031	-
South center	4	0.015	530	0.016	0.016	0.035	0.094	0.109	-
South aquaculture farms	4	0.015	753	0.015	0.03	0.018	0.085	0.046	-
Laguna Yavaros	4	0.015	517	0.016	0.017	0.035	0.094	0.034	-
September
Rio Mayo Irrigation District	5	0.015	769	0.016	0.035	0.021	0.042	0.031	0.065
Laguna Tobari	4	0.015	777	0.015	0.034	0.022	0.035	0.032	0.082
Aquaculture farms	5	0.015	753	0.015	0.071	0.019	0.048	0.037	0.041
Coast center	5	0.015	639	0.017	0.105	0.021	0.038	0.026	0.068
North center	5	0.015	1149	0.014	0.027	0.024	0.027	0.013	0.027
Rio mayo	5	0.015	821	0.015	0.037	0.02	0.035	0.338	0.047
South center	5	0.015	794	0.016	0.038	0.021	0.043	0.025	0.053
South aquaculture farms	5	0.015	736	0.019	0.038	0.022	0.036	0.029	0.065
Laguna Yavaros	5	0.015	685	0.016	0.038	0.021	0.046	0.03	0.085

## Sheet: Table_4_feb_matrix
	Estimated error matrix							Confusion matrix							Proportional error matrix
	District Irrigation in General
	allocations	S(Ộ)	S(Û1)	S(Û2)	S(Û3)	S(Û4)		Strata	Cultivation Area	Soil	Vegetation	Water	Total		Strata	Cultivation Area	Soil	Vegetation	Water	Total(Wi)	Pixcel
	Proportional	0.0153585	0.0173546	0.0290862	0.164075	0.0476434		Cultivation area	279	23	24	2	328		Cultivation area	0.461031	0.0380061	0.0396586	0.00330488	0.542001	1657352
	allocations 1	0.0163926	0.0160586	0.0330169	0.229129	0.0444878		Soil	8	135	21	6	170		Soil	0.018939	0.319595	0.0497149	0.0142042	0.402454	1230639
	allocations 2	0.0167811	0.0188982	0.0328266	0.0690849	0.0245207		Vegetation	10	0	14	1	25		Vegetation	0.00636371	0	0.00890919	0.000636371	0.0159093	48648
	allocations 3	0.0162893	0.01659	0.0333087	0.0935414	0.0404714		Water	0	1	0	29	30		Water	0	0.00132122	0	0.0383152	0.0396365	121202
	Proportional	0.020386	0.0256307	0.0369948	0.0391516	0.0186203		Total	297	159	59	38	553		Total	0.486334	0.358923	0.0982826	0.0564607	1	3057841
1	laguna Tobari														proportional estimation matrix
	allocations	S(Ộ)	S(Û1)	S(Û2)	S(Û3)	S(Û4)		Strata	Cultivation Area	Soil	Vegetation	Water	Total		Strata	Cultivation Area	Soil	Vegetation	Water	Total(Wi)	Pixcel
	Proportional	0.0153763	0.0170013	0.031928	0.191621	0.0454663		Cultivation area	276	15	11	1	303		Cultivation area	0.538893	0.0292876	0.0214776	0.00195251	0.59161	727092
	allocations 1	0.0155563	0.0172631	0.0328266	0.0935414	0.0444878		Soil	7	144	22	2	175		Soil	0.01401	0.288206	0.0440315	0.00400287	0.350251	430460
	allocations 2	0.0174444	0.019245	0.037547	0.0551677	0.0245207		Vegetation	12	1	11	1	25		Vegetation	0.00610836	0.00050903	0.00559933	0.00050903	0.0127257	15640
	allocations 3	0.0156874	0.0173494	0.0333087	0.0881917	0.0404714		Water	0	0	0	25	25		Water	0	0	0	0.0454132	0.0454132	55813
	Proportional	0.0204219	0.0262111	0.0378325	0.0400381	0.0190419		Total	295	160	44	29	528		Total	0.559011	0.318003	0.0711085	0.0518776	1	1229005
2	laguna_yavaros							Matriz Google Earth marzo del 2016
	Error estimator matrix							comfusion matrix							proportional estimation matrix
	allocations	S(Ộ)	S(Û1)	S(Û2)	S(Û3)	S(Û4)		Strata	Cultivation Area	Soil	Vegetation	Water	Total		Strata	Cultivation Area	Soil	Vegetation	Water	Total(Wi)	Pixcel
	Proportional	0.0154879	0.0194322	0.0314021	0.133702	0.0255495		Cultivation area	198	14	17	10	239		Cultivation area	0.383527	0.027118	0.032929	0.01937	0.462944	203810
	allocations 1	0.0162919	0.0173494	0.0354738	0.0935414	0.0340373		Soil	0	160	20	11	191		Soil	0	0.309712	0.038714	0.0212927	0.369719	162768
	allocations 2	0.0183006	0.0210559	0.0409159	0.0460566	0.0219043		Vegetation	6	0	5	1	12		Vegetation	0.0123283	0	0.0102736	0.00205471	0.0246566	10855
	allocations 3	0.0160204	0.0176471	0.0333087	0.0898717	0.0404714		Water	0	0	0	75	75		Water	0	0	0	0.142681	0.142681	62815
	Proportional	0.0189414	0.0264906	0.038236	0.0404651	0.019245		Total	204	174	42	97	517		Total	0.395855	0.33683	0.0819166	0.185398	1	440248
3	Aquaculture farms
	Error estimator matrix							comfusion matrix							proportional estimation matrix
	allocations	S(Ộ)	S(Û1)	S(Û2)	S(Û3)	S(Û4)		Strata	Cultivation Area	Soil	Vegetation	Water	Total		Strata	Cultivation Area	Soil	Vegetation	Water	Total(Wi)	Pixcel
	Proportional	0.0153043	0.0173442	0.0258754	0.125644	#NUM!		Cultivation area	305	34	17	4	360		Cultivation area	0.426712	0.0475678	0.0237839	0.00559622	0.503659	128341
	allocations 1	0.0176789	0.0167968	0.0328266	0.0485752	0.0726483		Soil	6	141	20	3	170		Soil	0.0166429	0.391109	0.0554765	0.00832147	0.47155	120159
	allocations 2	0.0175359	0.0175863	0.0320092	0.0460566	0.05		Vegetation	40	2	14	0	56		Vegetation	0.0171412	0.000857058	0.0059994	0	0.0239976	6115
	allocations 3	0.0176776	0.0158334	0.0333087	0.0617914	0.0726483		Water	0	1	1	8	10		Water	0	7.92726e-05	7.92726e-05	0.000634181	0.000792726	202
	Proportional	0.0208994	0.0246598	0.0355934	0.0376685	0.017915		Total	351	178	52	15	596		Total	0.460496	0.439613	0.0853391	0.0145519	1	254817
4	Coast center
	Error estimator matrix							comfusion matrix							proportional estimation matrix
	allocations	S(Ộ)	S(Û1)	S(Û2)	S(Û3)	S(Û4)		Strata	Cultivation Area	Soil	Vegetation	Water	Total		Strata	Cultivation Area	Soil	Vegetation	Water	Total(Wi)	Pixcel
	Proportional	0.0151717	0.0289104	0.0177199	0.101727	0.0546801		Cultivation area	84	13	27	1	125		Cultivation area	0.0980303	0.0151714	0.0315098	0.00116703	0.145878	4711
	allocations 1	0.0183121	0.0173494	0.0223906	0.0785905	0.0373773		Soil	5	486	20	14	525		Soil	0.00764642	0.743232	0.0305857	0.02141	0.802874	25928
	allocations 2	0.0158083	0.0269408	0.0189162	0.062361	0.0348991		Vegetation	19	1	34	1	55		Vegetation	0.00987349	0.000519657	0.0176684	0.000519657	0.0285812	923
	allocations 3	0.0188726	0.0181237	0.0231786	0.0532714	0.0328564		Water	0	4	1	35	40		Water	0	0.00226667	0.000566669	0.0198334	0.0226667	732
	Proportional	0.0257649	0.0220416	0.0318142	0.033669	0.0160128		Total	108	504	82	51	745		Total	0.11555	0.761189	0.0803304	0.0429301	1	32294
5	North center
	Error estimator matrix							comfusion matrix							proportional estimation matrix
	allocations	S(Ộ)	S(Û1)	S(Û2)	S(Û3)	S(Û4)		Strata	Cultivation Area	Soil	Vegetation	Water	Total		Strata	Cultivation Area	Soil	Vegetation	Water	Total(Wi)	Pixcel
	Proportional	0.0162978	0.0220719	0.0216981	0.146385	#NUM!		Cultivation area	273	10	47	0	330		Cultivation area	0.257816	0.00944381	0.0443859	0	0.311646	24903
	allocations 1	0.0209531	0.0165395	0.0302429	0.0785905	0.0444878		Soil	1	176	29	0	206		Soil	0.00325186	0.572327	0.0943039	0	0.669883	53529
	allocations 2	0.0257398	0.0172917	0.037547	0.051558	0.0245207		Vegetation	30	0	5	0	35		Vegetation	0.0155321	0	0.00258869	0	0.0181208	1448
	allocations 3	0.0223516	0.0170664	0.0323649	0.0617914	0.031135		Water	0	4	0	21	25		Water	0	5.60645e-05	0	0.000294338	0.000350403	28
	Proportional	0.0250607	0.0246598	0.0355934	0.0376685	0.017915		Total	304	190	81	21	596		Total	0.2766	0.581827	0.141279	0.000294338	1	79908
6	Rio mayo
	Error estimator matrix
	allocations	S(Ộ)	S(Û1)	S(Û2)	S(Û3)	S(Û4)		Strata	Cultivation Area	Soil	Vegetation	Water	Total		Strata	Cultivation Area	Soil	Vegetation	Water	Total(Wi)	Pixcel
	Proportional	0.0153163	0.0165206	0.0293557	0.203251	#NUM!		Cultivation area	235	19	18	3	275		Cultivation area	0.508351	0.0411007	0.0389375	0.00648959	0.594879	475516
	allocations 1	0.0169745	0.0181237	0.0333087	0.0596601	0.031135		Soil	5	152	12	1	170		Soil	0.0115626	0.351502	0.0277502	0.00231251	0.393127	314246
	allocations 2	0.0171688	0.0190117	0.0328266	0.051558	0.031135		Vegetation	34	6	19	1	60		Vegetation	0.00620013	0.00109414	0.00346478	0.000182357	0.0109414	8746
	allocations 3	0.019634	0.0173494	0.0424604	0.0532714	0.0253356		Water	0	4	3	43	50		Water	0	8.41685e-05	6.31264e-05	0.000904811	0.00105211	841
	Proportional	0.020999	0.0255377	0.0368605	0.0390095	0.0185527		Total	274	181	52	48	555		Total	0.526114	0.393781	0.0702156	0.00988927	1	799349
7	South center
	Error estimator matrix
	allocations	S(Ộ)	S(Û1)	S(Û2)	S(Û3)	S(Û4)		Strata	Cultivation Area	Soil	Vegetation	Water	Total		Strata	Cultivation Area	Soil	Vegetation	Water	Total(Wi)	Pixcel
	Proportional	0.0155073	0.0162304	0.0339458	0.147723	#NUM!		Cultivation area	317	20	13	0	350		Cultivation area	0.600281	0.0378726	0.0246172	0	0.66277	76605
	allocations 1	0.0155935	0.0160586	0.0354738	0.0935414	0.108972		Soil	10	129	10	1	150		Soil	0.0211109	0.272331	0.0211109	0.00211109	0.316664	36601
	allocations 2	0.0188125	0.0202721	0.0414751	0.0460566	0.0219043		Vegetation	16	1	8	0	25		Vegetation	0.0131507	0.00082192	0.00657536	0	0.020548	2375
	allocations 3	0.0155223	0.0176471	0.031497	0.105131	0.0404714		Water	0	0	0	5	5		Water	0	0	0	1.73036e-05	1.73036e-05	2
	Proportional	0.0210782	0.0261612	0.0377605	0.039962	0.0190057		Total	343	150	31	6	530		Total	0.634542	0.311026	0.0523035	0.0021284	1	115583
8	South aquaculture farms
	Error estimator matrix
	allocations	S(Ộ)	S(Û1)	S(Û2)	S(Û3)	S(Û4)		Strata	Cultivation Area	Soil	Vegetation	Water	Total		Strata	Cultivation Area	Soil	Vegetation	Water	Total(Wi)	Pixcel
	Proportional	0.0183012	0.0336692	0.0211306	0.134718	0.150105		Cultivation area	198	14	17	10	239		Cultivation area	0.128822	0.00910859	0.0110604	0.00650614	0.155497	16269
	allocations 1	0.0290974	0.0173494	0.0354738	0.0935414	0.0340373		Soil	0	160	20	11	191		Soil	0	0.682032	0.0852541	0.0468897	0.814176	85184
	allocations 2	0.0334922	0.0210559	0.0409159	0.0460566	0.0219043		Vegetation	6	0	5	1	12		Vegetation	0.0121576	0	0.0101313	0.00202626	0.0243152	2544
	allocations 3	0.0273461	0.0176471	0.0333087	0.0898717	0.0404714		Water	0	0	0	75	75		Water	0	0	0	0.00601189	0.00601189	629
	Proportional	0.0314178	0.0264906	0.038236	0.0404651	0.019245		Total	204	174	42	97	517		Total	0.140979	0.691141	0.106446	0.061434	1	104626
	S(Ộ)	selected accuracy
	S(Û1)	estimated user's accuracy for cultivation
	S(Û2)	estimated user's accuracy for soil
	S(Û3)	estimated user's accuracy for vegetation
	S(Û4)	estimated user's accuracy for water

## Sheet: Table_4sept_matrix
	Error estimator matrix								Matrix of confusion								Proportional error matrix
	District Irrigation in General
	Allocations	S(Ộ)	S(Û1)	S(Û2)	S(Û3)	S(Û4)	S(Û5)		Strata	Cultivation Area	Soil	Vegetation	Water	Cloud	Total		Strata	Cultivation Area	Soil	Vegetation	Water	Cloud	Total(Wi)	Pixcel
	Proportional	0.0151895	0.0390654	0.0210414	0.0371428	0.032149	0.055641		Cultivation Area	132	20	16	2	0	170		Cultivation Area	0.13977	0.0211773	0.0169418	0.00211773	0	0.180007	469460
	Allocations 1	0.0155401	0.0352506	0.0205466	0.0420084	0.031135	0.0654654		Soil	3	362	10	5	0	380		Soil	0.00371551	0.448339	0.012385	0.00619252	0	0.470632	2241085
	Allocations 2	0.0153144	0.0375419	0.0211112	0.0363422	0.031135	0.0654654		Vegetation	19	39	61	1	0	120		Vegetation	0.0315061	0.0646705	0.101151	0.00165822	0	0.198986	21934
	Allocations 3	0.0154296	0.0403473	0.020025	0.0403473	0.031135	0.0596601		Water	0	1	0	49	0	50		Water	0	0.00121968	0	0.0597645	0	0.0609842	153929
	Proportional	0.0185087	0.0370479	0.0323381	0.0370479	0.0176198	0.0370479		Cloud	0	23	2	0	25	50		Cloud	0	0.0411199	0.00357565	0	0.0446956	0.0893912	171433
									Total	154	445	89	57	25	770		Total	0.174992	0.576526	0.134054	0.069733	0.0446956	1	3057841
1	laguna Tobari
	Allocations	S(Ộ)	S(Û1)	S(Û2)	S(Û3)	S(Û4)	S(Û5)		Strata	Cultivation Area	Soil	Vegetation	Water	Cloud	Total		Strata	Cultivation Area	Soil	Vegetation	Water	Cloud	Total(Wi)	Pixcel
	Proportional	0.0152	0.033555	0.0219242	0.0347163	0.0317081	0.0821284		Cultivation Area	154	23	9	2	0	188		Cultivation Area	0.197682	0.029524	0.0115529	0.0025673	0	0.241327	296836
	Allocations 1	0.0157565	0.0345425	0.0205466	0.0420084	0.031135	0.0654654		Soil	5	314	11	4	0	334		Soil	0.00643248	0.40396	0.0141515	0.00514598	0	0.42969	528526
	Allocations 2	0.0154575	0.03669	0.0211112	0.0363422	0.031135	0.0654654		Vegetation	56	38	80	1	0	175		Vegetation	0.0721717	0.0489736	0.103102	0.00128878	0	0.225537	277414
	Allocations 3	0.0160186	0.0392953	0.020025	0.0403473	0.031135	0.0596601		Water	0	2	0	46	0	48		Water	0	0.00258712	0	0.0595038	0	0.062091	76373
	Proportional	0.0185266	0.0368796	0.0321911	0.0368796	0.0175397	0.0368796		Cloud	1	17	0	0	14	32		Cloud	0.00129238	0.0219705	0	0	0.0180934	0.0413563	50869
									Total	216	394	100	53	14	777		Total	0.277579	0.507015	0.128807	0.0685059	0.0180934	1	1230018
2	laguna_yavaros
	Error estimator matrix
	Allocations	S(Ộ)	S(Û1)	S(Û2)	S(Û3)	S(Û4)	S(Û5)		Strata	Cultivation Area	Soil	Vegetation	Water	Cloud	Total		Strata	Cultivation Area	Soil	Vegetation	Water	Cloud	Total(Wi)	Pixcel
	Proportional	0.0154006	0.0447389	0.02358	0.0395156	0.0202587	0.0752397		Cultivation Area	113	20	11	6	0	150		Cultivation Area	0.116484	0.0206166	0.0113391	0.00618497	0	0.154624	67992
	Allocations 1	0.0156874	0.0375419	0.0214115	0.0460566	0.0296586	0.0850963		Soil	5	328	15	2	0	350		Soil	0.00602215	0.395053	0.0180665	0.00240886	0	0.421551	185366
	Allocations 2	0.0152245	0.0375419	0.0239474	0.0375419	0.0253356	0.0850963		Vegetation	23	15	62	0	0	100		Vegetation	0.0454922	0.0296688	0.122631	0	0	0.197792	86974
	Allocations 3	0.0159927	0.0485752	0.0205466	0.0485752	0.0262375	0.062361		Water	0	4	0	51	0	55		Water	0	0.0123941	0	0.158024	0	0.170418	74937
	Proportional	0.0179251	0.0392953	0.0342997	0.0392953	0.0186886	0.0392953		Cloud	3	16	2	0	9	30		Cloud	0.00556144	0.029661	0.00370763	0	0.0166843	0.0556144	24455
3	Aquaculture farms								Total	144	383	90	59	9	685		Total	0.173559	0.487394	0.155744	0.166618	0.0166843	1	439724
	Error estimator matrix
	Allocations	S(Ộ)	S(Û1)	S(Û2)	S(Û3)	S(Û4)	S(Û5)		Strata	Cultivation Area	Soil	Vegetation	Water	Cloud	Total		Strata	Cultivation Area	Soil	Vegetation	Water	Cloud	Total(Wi)	Pixcel
	Proportional	0.0151675	0.071079	0.0187849	0.0479458	0.0369559	0.0406829		Cultivation Area	36	3	4	0	0	43		Cultivation Area	0.0473261	0.00394384	0.00525845	0	0	0.0565284	14414
	Allocations 1	0.0151675	0.071079	0.0187849	0.0479458	0.0369559	0.0406829		Soil	4	412	27	11	0	454		Soil	0.00531702	0.547653	0.0358899	0.0146218	0	0.603482	153880
	Allocations 2	0.0176771	0.0375419	0.0211112	0.0363422	0.031135	0.0654654		Vegetation	28	29	34	1	0	92		Vegetation	0.0373269	0.03866	0.0453255	0.0013331	0	0.122645	31273
	Allocations 3	0.0167504	0.0403473	0.020025	0.0403473	0.031135	0.0596601		Water	0	3	1	32	0	36		Water	0	0.00395968	0.00131989	0.0422366	0	0.0475161	12116
	Proportional	0.0211228	0.0370479	0.0323381	0.0370479	0.0176198	0.0370479		Cloud	5	19	11	2	91	128		Cloud	0.00663392	0.0252089	0.0145946	0.00265357	0.120737	0.169828	43304
4	Coast center								Total	73	466	77	46	91	753		Total	0.0966039	0.619425	0.102388	0.060845	0.120737	1	254987
	Error estimator matrix
	Allocations	S(Ộ)	S(Û1)	S(Û2)	S(Û3)	S(Û4)	S(Û5)		Strata	Cultivation Area	Soil	Vegetation	Water	Cloud	Total		Strata	Cultivation Area	Soil	Vegetation	Water	Cloud	Total(Wi)	Pixcel
	Proportional	0.0153472	0.166159	0.018846	0.0878956	0.0216762	0.0685947		Cultivation Area	0	1	15	4	0	20		Cultivation Area	0	0.000676596	0.0101489	0.00270639	0	0.0135319	437
	Allocations 1	0.0166608	0.105131	0.0214115	0.0375419	0.0262375	0.068313		Soil	2	320	12	15	1	350		Soil	0.00405648	0.649037	0.0243389	0.0304236	0.00202824	0.709884	22925
	Allocations 2	0.0157407	0.122474	0.020025	0.0460566	0.0272431	0.0617914		Vegetation	1	39	108	2	0	150		Vegetation	0.000295411	0.011521	0.0319044	0.000590822	0	0.0443116	1431
	Allocations 3	0.0157822	0.0850963	0.0204124	0.0532714	0.0253356	0.0551677		Water	0	9	0	61	0	70		Water	0	0.020639	0	0.139886	0	0.160525	5184
	Proportional	0.0257253	0.0408248	0.0356348	0.0408248	0.0194161	0.0408248		Cloud	2	1	2	0	41	46		Cloud	0.00311944	0.00155972	0.00311944	0	0.0639485	0.0717471	2317
5	North center								Total	5	370	137	82	42	636		Total	0.00747133	0.683433	0.0695116	0.173607	0.0659767	1	32294
	Error estimator matrix
	Allocations	S(Ộ)	S(Û1)	S(Û2)	S(Û3)	S(Û4)	S(Û5)		Strata	Cultivation Area	Soil	Vegetation	Water	Cloud	Total		Strata	Cultivation Area	Soil	Vegetation	Water	Cloud	Total(Wi)	Pixcel
	Proportional	0.0122379	0.0245411	0.0145534	0.0352978	0.0196397	0.0238644		Cultivation Area	143	4	129	14	0	290		Cultivation Area	0.00991563	0.00027736	0.00894487	0.000970761	0	0.0201086	1607
	Allocations 1	0.0109526	0.0654654	0.0149175	0.0342518	0.0178547	0.02453		Soil	4	241	43	2	0	290		Soil	0.00720049	0.43383	0.0774053	0.00360025	0	0.522036	41719
	Allocations 2	0.0111489	0.0654654	0.0157014	0.032485	0.0154497	0.02453		Vegetation	110	20	160	0	0	290		Vegetation	0.0443832	0.00806968	0.0645574	0	0	0.11701	9351
	Allocations 3	0.0111182	0.0551677	0.0163436	0.0309662	0.0172842	0.0229416		Water	0	25	0	265	0	290		Water	0	0.00738599	0	0.0782915	0	0.0856775	6847
	Proportional	0.0144789	0.0269563	0.0235294	0.0269563	0.0128203	0.0269563		Cloud	11	26	14	1	238	290		Cloud	0.00967878	0.0228771	0.0123185	0.000879889	0.209414	0.255168	20392
6	Rio mayo								Total	268	316	346	282	238	1450		Total	0.0711781	0.47244	0.163226	0.0837424	0.209414	1	79916
	Error estimator matrix
	Allocations	S(Ộ)	S(Û1)	S(Û2)	S(Û3)	S(Û4)	S(Û5)		Strata	Cultivation Area	Soil	Vegetation	Water	Cloud	Total		Strata	Cultivation Area	Soil	Vegetation	Water	Cloud	Total(Wi)	Pixcel
	Proportional	0.0150913	0.0370021	0.0202154	0.0345626	0.337567	0.0470436		Cultivation Area	131	7	16	0	0	154		Cultivation Area	0.159955	0.00854721	0.0195365	0	0	0.188039	150365
	Allocations 1	0.0153353	0.0342518	0.0205466	0.0375419	0.05	0.0483046		Soil	11	359	19	4	0	393		Soil	0.0133819	0.436737	0.0231142	0.00486615	0	0.478099	382312
	Allocations 2	0.0153359	0.0375419	0.0197787	0.0342518	0.0726483	0.0551677		Vegetation	42	58	74	2	0	176		Vegetation	0.0513881	0.0709645	0.0905409	0.00244705	0	0.21534	172197
	Allocations 3	0.015629	0.0387298	0.020025	0.0403473	0.0404714	0.0420084		Water	0	0	0	10	0	10		Water	0	0	0	0.00172576	0	0.00172576	1380
	Proportional	0.0186231	0.0358715	0.0313112	0.0358715	0.0170603	0.0358715		Cloud	1	32	5	0	58	96		Cloud	0.00121663	0.038932	0.00608313	0	0.0705643	0.116796	93396
7	South center								Total	185	456	114	16	58	829		Total	0.225941	0.555181	0.139275	0.00903896	0.0705643	1	799650
	Error estimator matrix
	Allocations	S(Ộ)	S(Û1)	S(Û2)	S(Û3)	S(Û4)	S(Û5)		Strata	Cultivation Area	Soil	Vegetation	Water	Cloud	Total		Strata	Cultivation Area	Soil	Vegetation	Water	Cloud	Total(Wi)	Pixcel
	Proportional	0.0150249	0.0492177	0.0182569	0.043067	#NUM!	0.0438718		Cultivation Area	123	11	16	0	0	150		Cultivation Area	0.0905631	0.00809914	0.0117806	0	0	0.110443	12762
	Allocations 1	0.0156237	0.0420084	0.020025	0.043067	0.031135	0.0438718		Soil	8	345	23	4	0	380		Soil	0.0127542	0.550026	0.0366684	0.00637711	0	0.605826	70005
	Allocations 2	0.0167097	0.0460566	0.020025	0.0338754	0.028374	0.0654654		Vegetation	40	30	42	2	0	114		Vegetation	0.0504758	0.0378569	0.0529996	0.00252379	0	0.143856	16623
	Allocations 3	0.016284	0.0375419	0.0205466	0.0431092	0.0253356	0.0532714		Water	1	39	0	35	0	75		Water	1.60388e-05	0.000625514	0	0.000561359	0	0.00120291	139
	Proportional	0.0210121	0.0364801	0.0318425	0.0364801	0.0173498	0.0364801		Cloud	8	13	2	0	52	75		Cloud	0.0147917	0.0240365	0.00369793	0	0.0961461	0.138672	16024
8	South aquaculture farms								Total	180	438	83	41	52	794		Total	0.168601	0.620644	0.105147	0.00946226	0.0961461	1	115553
	Error estimator matrix
	Allocations	S(Ộ)	S(Û1)	S(Û2)	S(Û3)	S(Û4)	S(Û5)		Strata	Cultivation Area	Soil	Vegetation	Water	Cloud	Total		Strata	Cultivation Area	Soil	Vegetation	Water	Cloud	Total(Wi)	Pixcel
	Proportional	0.0152504	0.0712652	0.0206302	0.0478227	0.0272265	0.0364783		Cultivation Area	17	14	100	19	0	150		Cultivation Area	0.00652113	0.00537034	0.0383596	0.00728832	0	0.0575394	6020
	Allocations 1	0.0168036	0.0447214	0.0231326	0.0460566	0.019189	0.0460566		Soil	4	412	27	11	0	454		Soil	0.00451224	0.46476	0.0304576	0.0124086	0	0.512139	53582
	Allocations 2	0.0190665	0.0375419	0.0223957	0.0363422	0.0293877	0.0654654		Vegetation	23	58	79	0	0	160		Vegetation	0.0181295	0.0457179	0.0622709	0	0	0.126118	13195
	Allocations 3	0.0176498	0.0447214	0.0283552	0.0403473	0.0178547	0.0375419		Water	0	5	1	50	0	56		Water	0	0.00789477	0.00157895	0.0789477	0	0.0884214	9251
	Proportional	0.0195976	0.0378997	0.0330816	0.0378997	0.0180249	0.0378997		Cloud	0	8	4	0	38	50		Cloud	0	0.0345252	0.0172626	0	0.163994	0.215782	22576
									Total	44	497	211	80	38	870		Total	0.0291629	0.558268	0.14993	0.0986446	0.163994	1	104624
	S(Ộ)	selected accuracy
	S(Û1)	estimated user's accuracy for cultivation
	S(Û2)	estimated user's accuracy for soil
	S(Û3)	estimated user's accuracy for vegetation
	S(Û4)	estimated user's accuracy for water
	S(Û5)	estimated user's accuracy for cloud
